# Supplementary material for: Evaluation of a commercial packed bed flow hydrogenator for reaction screening, optimization, and synthesis
Source: PubMed Central journal article supplement (PMC3170201; doi:10.3762/bjoc.7.132), 2011-08-22
Supplement: Beilstein_J_Org_Chem-07-1141-s001.pdf [file Beilstein_J_Org_Chem-07-1141-s001.pdf]

# Supporting Information

for

## **Evaluation of a commercial packed bed flow hydrogenator for reaction screening, optimization, and synthesis**

Marian C. Bryan<sup>1</sup>, David Wernick<sup>2</sup>, Christopher D. Hein<sup>1</sup>,

James V. Petersen<sup>3</sup>, John W. Eschelbach<sup>2</sup> and Elizabeth M. Doherty<sup>1\*</sup>

<sup>1</sup>*Medicinal Chemistry Research Technology, Department of Chemistry Research and Discovery, Amgen, Inc., One Amgen Center Drive, Thousand Oaks, CA 91320, USA,*

<sup>2</sup>*Discovery Analytical Sciences, Department of Chemistry Research and Discovery, Amgen, Inc., One Amgen Center Drive, Thousand Oaks, CA 91320, USA and*

<sup>3</sup>*Research Automation Technology, Department of Chemistry Research and Discovery, Amgen, Inc., One Amgen Center Drive, Thousand Oaks, CA 91320, USA*

Email: Elizabeth M. Doherty - [edoherty@amgen.com](mailto:edoherty@amgen.com)

\* *Corresponding author*

## **Experimental queues and alternating Pd/quartz results**

**Evaluation of a Commercial Packed Bed Flow Hydrogenator for Reaction Screening, Optimization, and Synthesis**  
**Supplemental Information**

**Appendix A**

Experimental queues for which an "instability detected" status was recorded by the auto sampler software during the run.

| Entry | Queue date | Experiment # in queue | H2 mode    | Flow rate (mL/min) | Temperature (°C) | Pressure setting (bar) | Status                                      |
|-------|------------|-----------------------|------------|--------------------|------------------|------------------------|---------------------------------------------|
| 1     | 6/7/2010   | 1                     | full       | 1                  | 60               |                        | Collected                                   |
|       |            | 2                     | controlled | 1                  | 60               | 60                     | Collected with Error (instability detected) |
|       |            | 3                     | controlled | 1                  | 60               | 60                     | Collected                                   |
| 2     | 6/25/2010  | 1                     | controlled | 0.5                | 60               | 60                     | Collected with Error (instability detected) |
|       |            | 2                     | controlled | 1                  | 60               | 60                     | Collected                                   |
| 3     | 9/22/2010  | 1                     | full       | 1                  | 30               |                        | Collected                                   |
|       |            | 2                     | full       | 1                  | 30               |                        | Collected                                   |
|       |            | 3                     | full       | 1                  | 30               |                        | Collected                                   |
|       |            | 4                     | controlled | 1                  | 30               | 100                    | Collected with Error (instability detected) |
| 4     | 9/22/2010  | 1                     | full       | 1                  | 30               |                        | Collected                                   |
|       |            | 2                     | full       | 1                  | 30               |                        | Collected                                   |
|       |            | 3                     | full       | 1                  | 30               |                        | Collected                                   |
|       |            | 4                     | full       | 1                  | 30               |                        | Collected                                   |
|       |            | 5                     | controlled | 1                  | 30               | 10                     | Collected                                   |
|       |            | 6                     | controlled | 1                  | 30               | 10                     | Collected                                   |
|       |            | 7                     | controlled | 1                  | 30               | 10                     | Collected                                   |
|       |            | 8                     | controlled | 1                  | 30               | 10                     | Collected                                   |
|       |            | 9                     | controlled | 1                  | 30               | 10                     | Collected                                   |
|       |            | 10                    | controlled | 1                  | 30               | 30                     | Collected                                   |
|       |            | 11                    | controlled | 1                  | 30               | 30                     | Collected                                   |
|       |            | 12                    | controlled | 1                  | 30               | 30                     | Collected                                   |
|       |            | 13                    | controlled | 1                  | 30               | 30                     | Collected                                   |
|       |            | 14                    | controlled | 1                  | 30               | 30                     | Collected                                   |
|       |            | 15                    | controlled | 1                  | 30               | 60                     | Collected                                   |
|       |            | 16                    | controlled | 1                  | 30               | 60                     | Collected                                   |
|       |            | 17                    | controlled | 1                  | 30               | 60                     | Collected                                   |
|       |            | 18                    | controlled | 1                  | 30               | 60                     | Collected                                   |
|       |            | 19                    | controlled | 1                  | 30               | 60                     | Collected                                   |
|       |            | 20                    | controlled | 1                  | 30               | 80                     | Collected with Error (instability detected) |
|       |            | 21                    | controlled | 1                  | 30               | 80                     | Collected                                   |
|       |            | 22                    | controlled | 1                  | 30               | 80                     | Collected                                   |
|       |            | 23                    | controlled | 1                  | 30               | 80                     | Collected                                   |
|       |            | 24                    | controlled | 1                  | 30               | 80                     | Collected                                   |
|       |            | 25                    | controlled | 1                  | 30               | 100                    | Collected                                   |
|       |            | 26                    | controlled | 1                  | 30               | 100                    | Collected                                   |
|       |            | 27                    | controlled | 1                  | 30               | 100                    | Collected                                   |
|       |            | 28                    | controlled | 1                  | 30               | 100                    | Collected                                   |
| 5     | 9/27/2010  | 1                     | controlled | 1                  | 30               | 10                     | Collected                                   |
|       |            | 2                     | controlled | 1                  | 30               | 10                     | Collected                                   |
|       |            | 3                     | controlled | 1                  | 30               | 10                     | Collected                                   |
|       |            | 4                     | controlled | 1                  | 30               | 80                     | Collected with Error (instability detected) |
|       |            | 5                     | controlled | 1                  | 30               | 80                     | Collected                                   |
|       |            | 6                     | controlled | 1                  | 30               | 80                     | Collected with Error (instability detected) |
| 6     | 9/27/2010  | 1                     | controlled | 1                  | 30               | 10                     | Collected with Error (instability detected) |
|       |            | 2                     | controlled | 1                  | 30               | 10                     | Collected                                   |
|       |            | 3                     | controlled | 1                  | 30               | 80                     | Collected with Error (instability detected) |
|       |            | 4                     | controlled | 1                  | 30               | 80                     | Collected with Error (instability detected) |
| 7     | 4/15/2011  | 1                     | full       | 1                  | 30               |                        | Collected                                   |
|       |            | 2                     | controlled | 1                  | 30               | 60                     | Collected with Error (instability detected) |
|       |            | 3                     | controlled | 1                  | 30               | 60                     | Collected                                   |
|       |            | 4                     | controlled | 1                  | 30               | 60                     | Collected                                   |

## Appendix B

Full data set for conversion of styrene to ethylbenzene over sequential reactions alternating 10% Pd/C with quartz on the AutoH<sup>3</sup> system.<sup>a</sup>

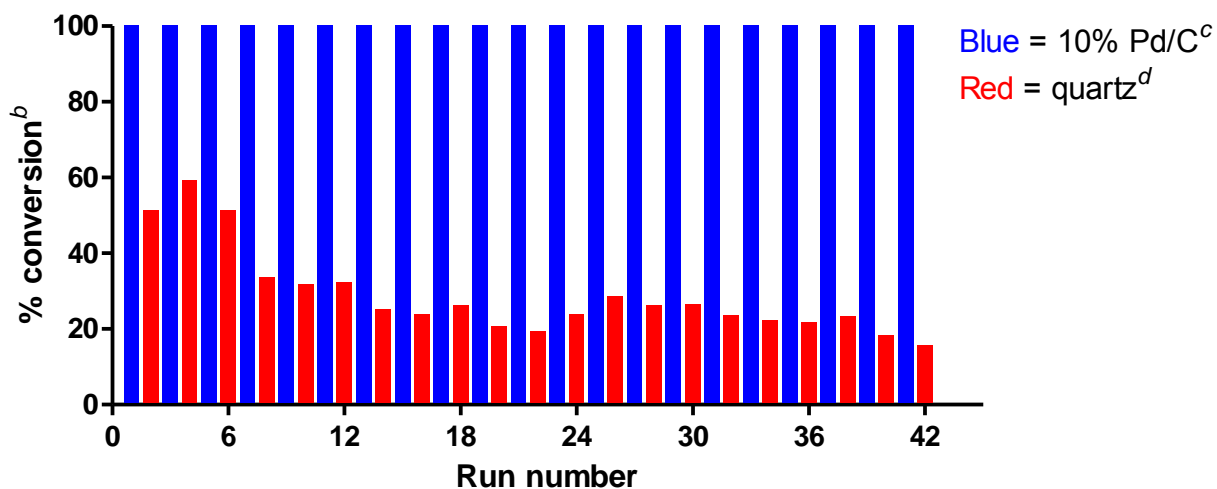

<sup>a</sup>All reactions were performed at a flow rate of 1.0 mL/min, temperature 30 °C, 0.5 M styrene in MeOH, 1 mL injection per reaction, run in order 1 through 6, then repeated in order 1 through 6.

<sup>b</sup>Conversion based on GC-MS analysis using decane as an internal standard. <sup>c</sup>Data represented in blue correspond to reactions performed through a 30 mm 10% Pd/C CatCart™.

<sup>d</sup>Data represented in red correspond to reactions performed through 30 mm quartz CatCart™.
